# Supplementary material for: A two-step strategy improves the wide-temperature-range thermoelectric performance of Mg3+xBi1.29Sb0.7Te0.01
Source: Royal Society of Chemistry journal article supplement (doi:10.1039/d4ta08026b), 2025-01-01
Supplement: d4ta08026b1.pdf [file d4ta08026b1.pdf]

Supporting Information

## Two-step strategy improves the wide-temperature-range thermoelectric performance of $\text{Mg}_{3+x}\text{Bi}_{1.29}\text{Sb}_{0.7}\text{Te}_{0.01}$

*Yushuo Ma*<sup>a,1</sup>, *Xiao-Lei Shi*<sup>b,1</sup>, *Li Zhang*<sup>\*a</sup>, *Han Gao*<sup>c</sup>, *Meng Li*<sup>b</sup>, *Liang-Cao Yin*<sup>d</sup>, *Wei-Di Liu*<sup>b</sup>,  
*Qingfeng Liu*<sup>d</sup>, *Yan-Ling Yang*<sup>a</sup>, *Zhi-Gang Chen*<sup>\*b</sup>

<sup>a</sup> School of Materials Science and Engineering, Shaanxi University of Science & Technology, Xi'an 710021, China.

<sup>b</sup> School of Chemistry and Physics, ARC Research Hub in Zero-emission Power Generation for Carbon Neutrality, and Centre for Materials Science, Queensland University of Technology, Brisbane, Queensland 4000, Australia.

<sup>c</sup> Key Laboratory of Material Physics of Ministry of Education, School of Physics and Microelectronics, Zhengzhou University, Zhengzhou 450052, China.

<sup>d</sup> State Key Laboratory of Materials-Oriented Chemical Engineering, College of Chemical Engineering, Nanjing Tech University, Nanjing 211816, China.

<sup>1</sup> These two authors contribute equally.

\* Corresponding author e-mails: zhangli@sust.edu.cn (L. Zhang), zhigang.chen@qut.edu.au (Z.-G. Chen).

## 1. Materials and Methods

*Material synthesis:* Under argon protection in a glovebox with oxygen and water content below 0.1 ppm, high-purity magnesium powders (Mg, 99.5%, Alfa Aesar), bismuth powders (Bi, 99.99%, Alfa Aesar), antimony powders (Sb, 99.99%, Alfa Aesar), and tellurium powders (99.999%) were weighed according to the nominal stoichiometry of  $\text{Mg}_{3+x}\text{Bi}_{1.29}\text{Sb}_{0.7}\text{Te}_{0.01}$  ( $x = 0.2, 0.3, 0.4, 0.5$ ). All elements were loaded into a stainless-steel jar and mixed for 15 minutes without grinding balls, followed by continuous ball milling at 500 rpm for 10 hours using a planetary ball mill (QM3SP2; Nanjing Instrument Company, China). The prepared powders were then loaded into a graphite mold with a diameter of 12.7 mm and hot-pressed using a ZT-40-20Y model hot press (Shanghai Chenhua Electric Furnace Co., China) under an axial pressure of 60 MPa at 973, 1023, and 1073 K for 2 minutes.

*Structural characterization:* The phase characterization was conducted using X-ray diffraction (XRD, Bruker D8 Advance) with Cu-K $\alpha$  radiation, set at a scanning rate of 4° per minute. The fresh fracture surfaces and HNO<sub>3</sub>-etched surfaces of the samples were analyzed by scanning electron microscopy (SEM, Hitachi Regulus 8100) to reveal surface morphology and grain size. The nanostructural features of  $\text{Mg}_{3.4}\text{Bi}_{1.29}\text{Sb}_{0.7}\text{Te}_{0.01}$  sintered at 1073 K were observed using transmission electron microscopy (TEM, FEI Talos F200S).

*Properties measurement:* The Seebeck coefficient ( $S$ ) and electrical conductivity ( $\sigma$ ) were measured using the four-probe method (CTA-3, Beijing Cryotech Co.) under a helium atmosphere, in the temperature range of 300 to 773 K. The thermal conductivity ( $\kappa$ ) was calculated using  $\kappa = D\rho C_p$ , where thermal diffusivity ( $D$ ) was measured by an LFA 467 HT laser flash apparatus (NETZSCH, GmbH, Selb, Germany), specific heat capacity ( $C_p$ ) was derived using the Dulong-Petit law, and density ( $\rho$ ) was measured using the Archimedes method. Room-temperature carrier concentration ( $n$ ) and mobility ( $\mu$ ) were characterized under a 1.5 T magnetic field using a physical property measurement system (Joule Yacht-HET-3RT). The van der Pauw method was used with a magnetic field up to  $\pm 0.5$  T.  $n$

and  $\mu$  were calculated using  $n = 1/(eR_H)$  and  $\mu = \sigma R_H$ , where  $e$  represents the electron charge.

*DFT calculation:* Density-functional theory (DFT) calculations were performed using the all electron projected augmented wave (PAW) method, as implemented in the Vienna Ab initio Simulation Package (VASP).<sup>1-6</sup> The generalized gradient approximation (GGA) with the fully relativistic Perdew-Burke-Ernzerhof (PBE) functional was employed to treat the exchange correlations.<sup>7</sup> To simulate the multiple doping envisaged by this work, quasi-random alloys were generated by minimizing the structural order derived from a  $2 \times 2 \times 2$  supercell containing 40 atoms using USPEX code, based on an evolutionary algorithm which features local optimization, real-space representation and flexible physically motivated variation operators.<sup>8</sup> All atoms in the as-built structures were allowed to relax in their geometric optimizations, during which the Brillouin zone was sampled by a  $0.03 \text{ \AA}^{-3}$  Monkhorst-Pack  $\mathbf{k}$ -mesh, the valence wave functions were expanded in a plan-wave basis with a cut-off energy of 500 eV, and the convergence criteria were set to be  $1 \times 10^{-7}$  eV per electron and  $1 \times 10^{-3}$  eV  $\cdot \text{\AA}^{-1}$  per unit cell. A denser  $0.02 \text{ \AA}^{-3}$  Monkhorst-Pack  $\mathbf{k}$ -mesh was adopted for calculating density-of-state (DOS), and a line-mode  $\mathbf{k}$ -path based on Brillouin path features indicated by the AFLOW framework was adopted for calculating band structures.<sup>9, 10</sup> Because Bi and Te are heavy elements, spin-orbital coupling (SOC) was considered by the non-self-consistent calculations.

*Modelling.* For calculation details of the single parabolic band (SPB) modeling, there are:<sup>9, 11-14</sup>

$$S(\eta) = \frac{k_B}{e} \cdot \left[ \frac{\left(g + \frac{5}{2}\right) \cdot F_{g + \frac{3}{2}}(\eta)}{\left(g + \frac{3}{2}\right) \cdot F_{g + \frac{1}{2}}(\eta)} - \eta \right] \quad (\text{S1-1})$$

$$n = \frac{1}{e \cdot R_H} = \frac{(2m^* \cdot k_B T)^{\frac{3}{2}}}{3\pi^2 \hbar^3} \cdot \frac{\left(g + \frac{3}{2}\right)^2 \cdot F_{g + \frac{1}{2}}^2(\eta)}{\left(2g + \frac{3}{2}\right) \cdot F_{2g + \frac{1}{2}}(\eta)} \quad (\text{S1-2})$$

$$\mu = \left[ \frac{e\pi\hbar^4}{\sqrt{2}(k_B T)^{\frac{3}{2}} E_{def}^2 (m^*)^{\frac{5}{2}}} C_l \right] \frac{\left(2g + \frac{3}{2}\right) \cdot F_{2g + \frac{1}{2}}(\eta)}{\left(g + \frac{3}{2}\right)^2 \cdot F_{g + \frac{1}{2}}(\eta)} \quad (\text{S1-3})$$

$$L = \left( \frac{k_B}{e} \right)^2 \cdot \left\{ \frac{\left(g + \frac{7}{2}\right) \cdot F_{g + \frac{5}{2}}(\eta)}{\left(g + \frac{3}{2}\right) \cdot F_{g + \frac{1}{2}}(\eta)} - \left[ \frac{\left(g + \frac{5}{2}\right) \cdot F_{g + \frac{3}{2}}(\eta)}{\left(g + \frac{3}{2}\right) \cdot F_{g + \frac{1}{2}}(\eta)} \right]^2 \right\} \quad (\text{S1-4})$$

where  $\eta$  is the reduced Fermi level,  $k_B$  is the Boltzmann constant,  $g$  is the carrier scattering factor ( $g = -1/2$  for acoustic phonon scattering),  $\hbar$  is the reduced plank constant,  $C_l$  is the elastic constant for longitudinal vibrations,  $E_{def}$  is the deformation potential coefficient,  $m^*$  is the effective mass, and  $L$  is the Lorenz number. For  $C_l$ , there is:<sup>11-14</sup>

$$C_l = v_l^2 \cdot \rho \quad (\text{S1-5})$$

where  $v_l$  is the longitudinal sound velocity.  $F_i(\eta)$  is the Fermi integral expressed as:<sup>11-14</sup>

$$F_i(\eta) = \int_0^{\infty} \frac{x^i}{1 + e^{(x-\eta)}} dx \quad (\text{S1-6})$$

*uncertainty analysis:* The accuracy and reliability of the three core parameters—electrical conductivity ( $\sigma$ ), Seebeck coefficient ( $S$ ), and thermal conductivity ( $\kappa$ )—are critical when evaluating the performance of thermoelectric materials. To ensure a comprehensive and precise assessment of the

fluctuation characteristics and measurement accuracy of these parameters, a rigorous approach involving multiple measurements was adopted. Each thermoelectric material sample underwent a minimum of three independent tests to guarantee consistency and reliability in the evaluation.

A series of precise measurements were conducted, revealing that the measured value of  $\sigma$  fluctuated around its average by approximately  $\pm 10\%$ . This variability can be attributed to slight differences in the material preparation process, limitations in measurement equipment precision, and minor changes in environmental conditions. In contrast, the measured value of  $S$  demonstrated greater stability, with a smaller fluctuation of about  $\pm 2\%$ , providing strong evidence of the high accuracy and excellent repeatability of this parameter. Similarly, the fluctuation range of the measured  $\kappa$  was approximately  $\pm 5\%$ , further reflecting the high accuracy and repeatability of the entire measurement process. The remaining key performance parameters, such as the  $ZT$  value, were derived from the three core parameters mentioned above using specific formulas.

## 2. Supporting Figures

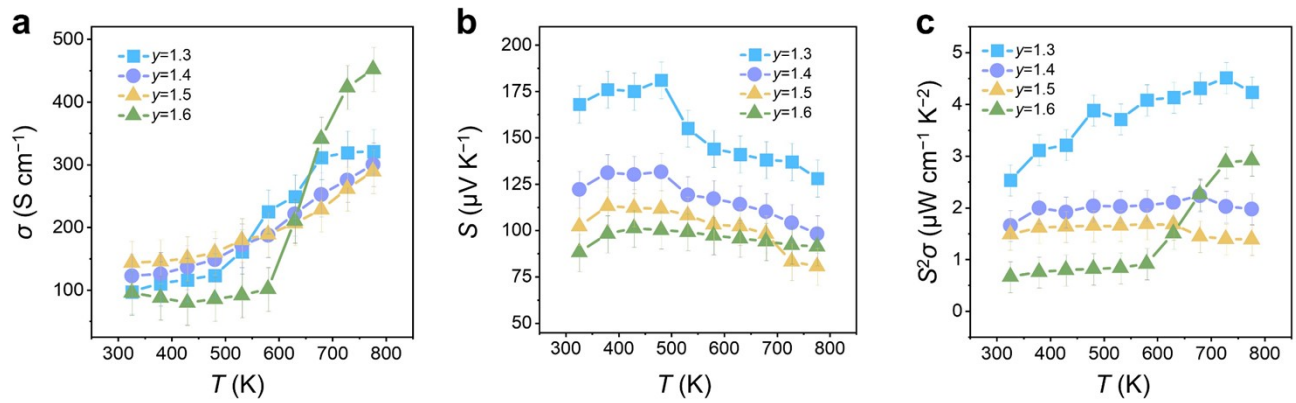

**Figure S1.** Temperature-dependent (a) electrical conductivity ( $\sigma$ ), (b) Seebeck coefficient ( $S$ ), and (c) power factor ( $S^2\sigma$ ) of  $\text{Mg}_{3.2}\text{Bi}_{2-y}\text{Sb}_y$ .

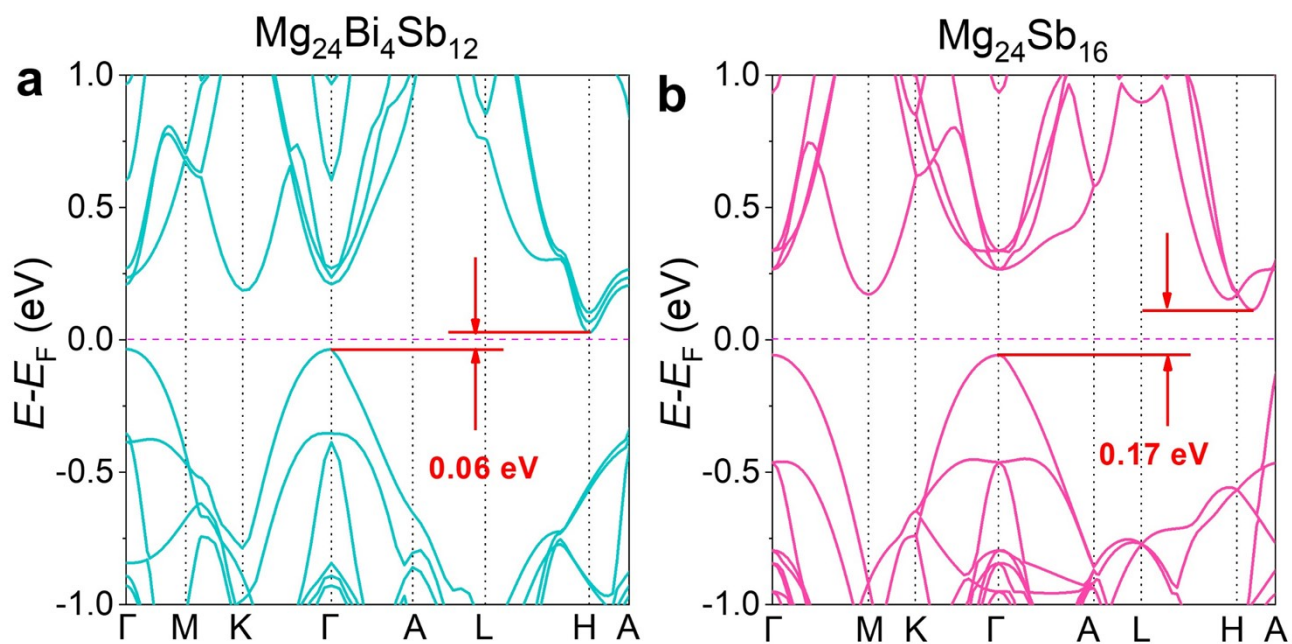

**Figure S2.** Calculated band structures of (a)  $\text{Mg}_{24}\text{Bi}_4\text{Sb}_{12}$  and (b)  $\text{Mg}_{24}\text{Sb}_{16}$ .

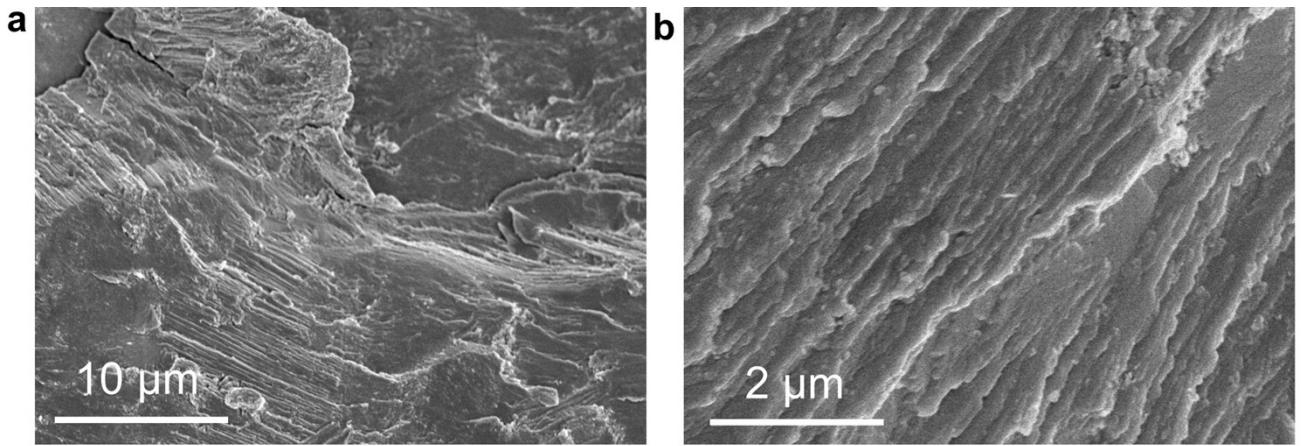

**Figure S3.** (a-b) Scanning electron microscopy (SEM) images of fractured surfaces of  $\text{Mg}_{3.4}\text{Bi}_{1.29}\text{Sb}_{0.7}\text{Te}_{0.01}$ .



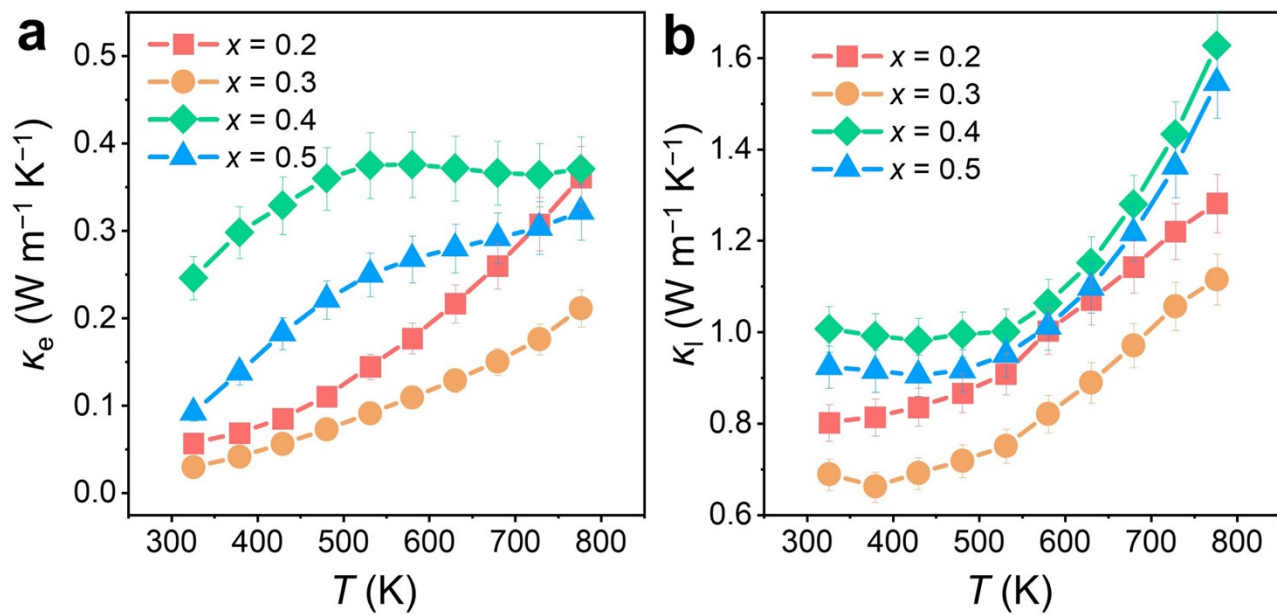

**Figure S4.** Temperature-dependent (a) electrical thermal conductivity ( $\kappa_e$ ) and (b) lattice thermal conductivity ( $\kappa_l$ ) of  $\text{Mg}_{3+x}\text{Bi}_{1.29}\text{Sb}_{0.7}\text{Te}_{0.01}$ .

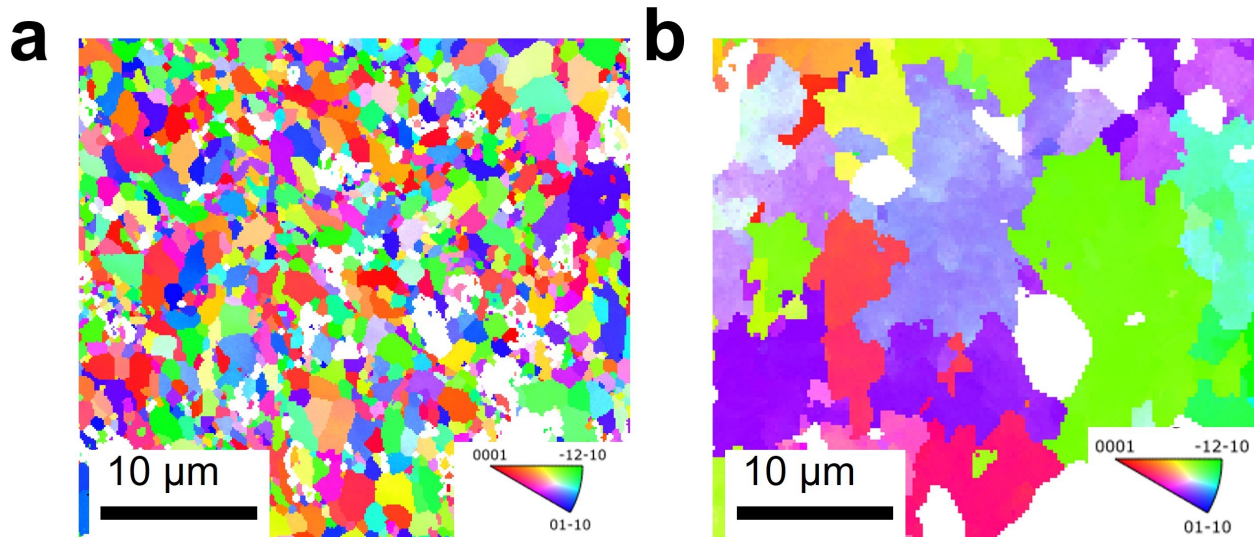

**Figure S5.** Electron Back Scatter Diffraction images of the samples for hot-pressing at (a) 973 K and (b) 1073 K.

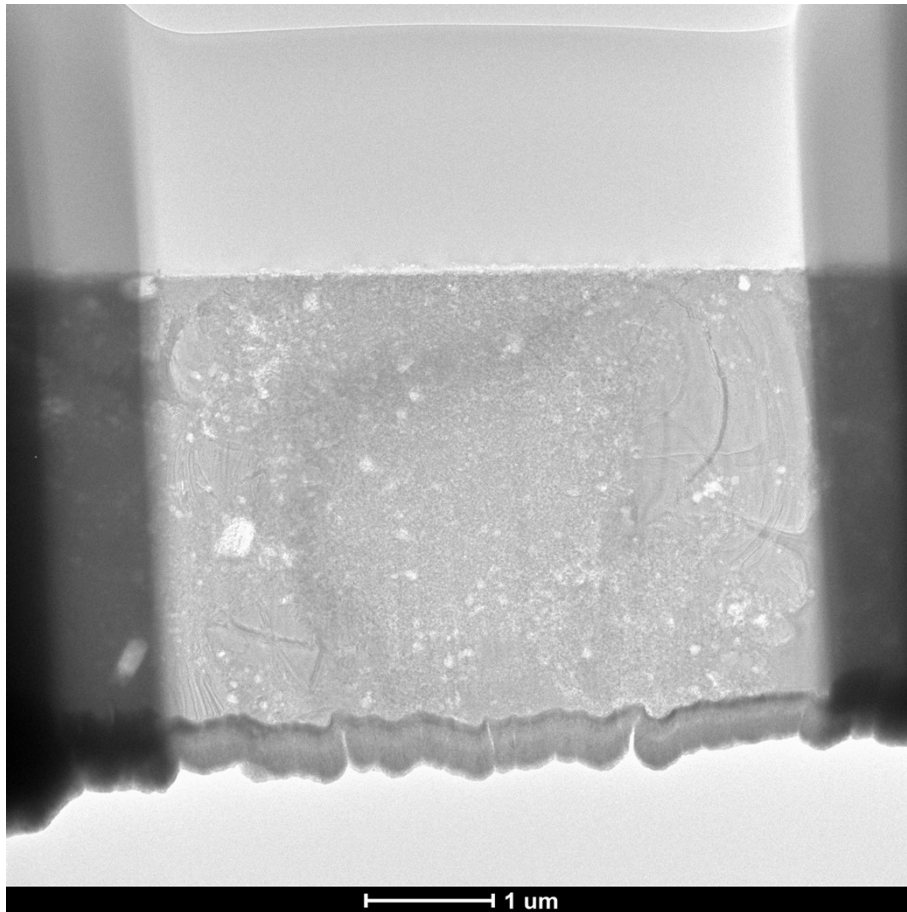

**Figure S6.** Transmission electron microscopy (TEM) image of the overview of the sample ( $\text{Mg}_{3.4}\text{Bi}_{1.29}\text{Sb}_{0.7}\text{Te}_{0.01}$ ) prepared by the focused ion beam (FIB) technique.

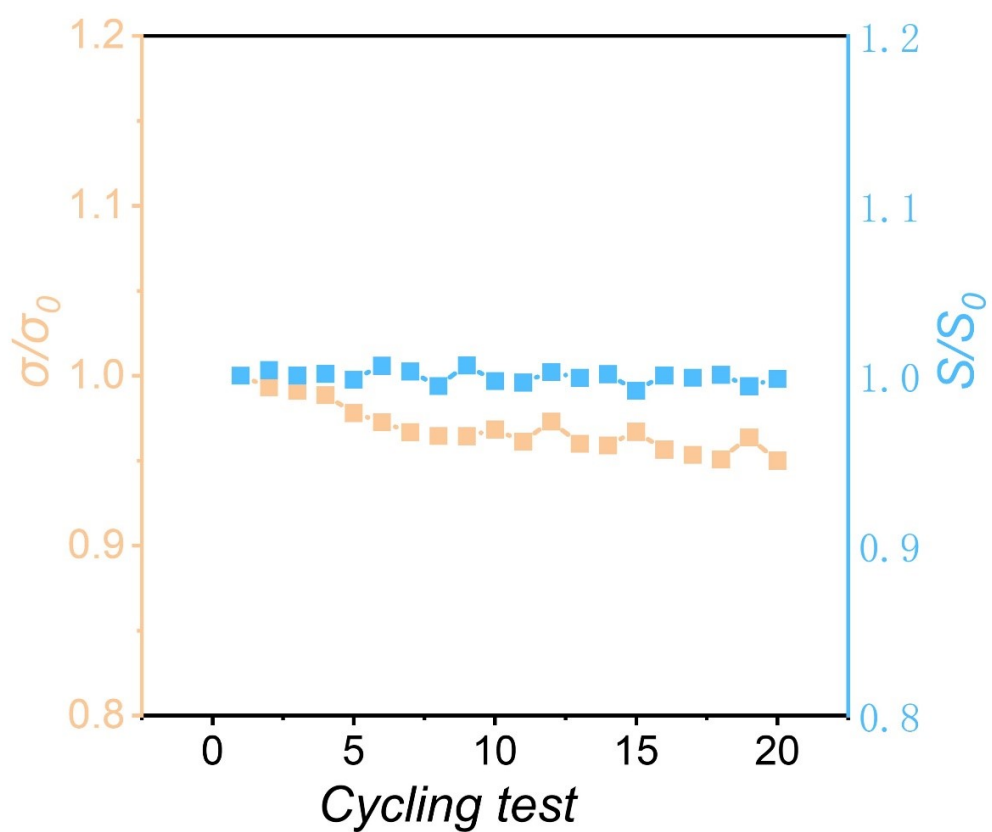

**Figure S7.** Stability of  $\sigma(\sigma/\sigma_0)$  and  $S(S/S_0)$  for  $\text{Mg}_{3.4}\text{Bi}_{1.29}\text{Sb}_{0.7}\text{Te}_{0.01}$ .

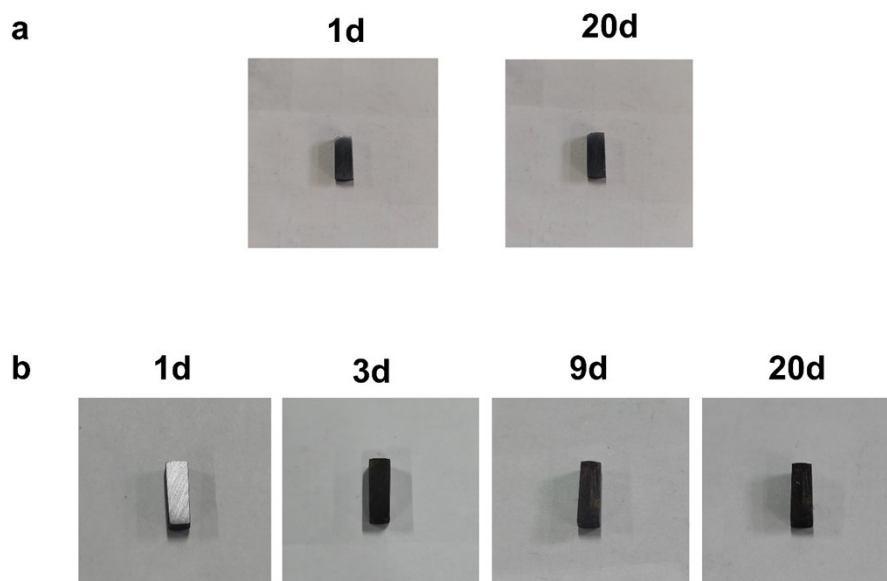

**Figure S8.** The optical images of  $\text{Mg}_{3.4}\text{Bi}_{1.29}\text{Sb}_{0.7}\text{Te}_{0.01}$  samples. Samples were exposed to the ambient air (a) and water (b) with increasing days (d).

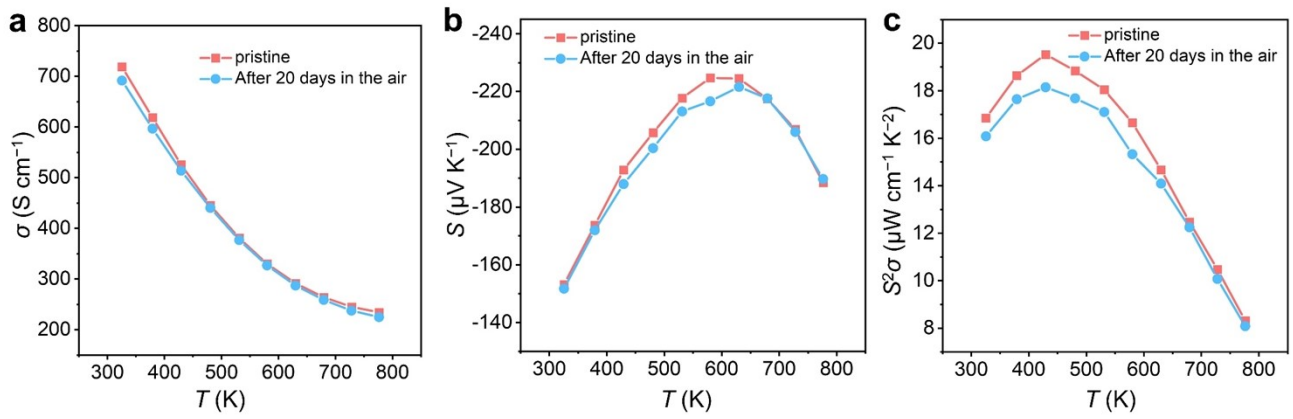

**Figure S9.** Thermoelectric performance of  $\text{Mg}_{3.4}\text{Bi}_{1.29}\text{Sb}_{0.7}\text{Te}_{0.01}$  sintered at 1073 K in the ambient air. Temperature-dependent (a) electrical conductivity ( $\sigma$ ) and (b) Seebeck coefficient ( $S$ ), and (c)  $S^2\sigma$ .

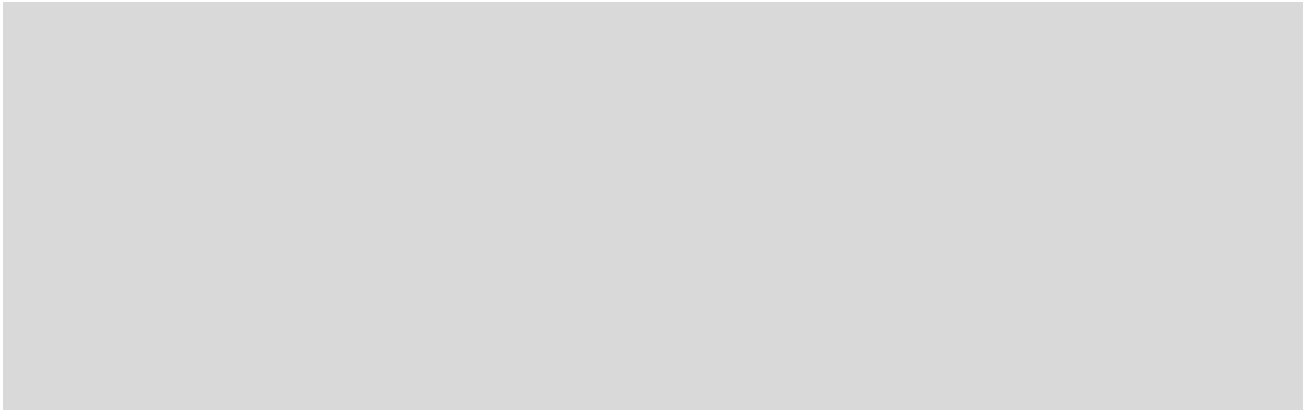

**Figure S10.** Thermoelectric performance of  $\text{Mg}_{3.4}\text{Bi}_{1.29}\text{Sb}_{0.7}\text{Te}_{0.01}$  sintered at 1073 K in the water. Temperature-dependent (a) electrical conductivity ( $\sigma$ ) and (b) Seebeck coefficient ( $S$ ), and (c)  $S^2\sigma$ .

### 3. Supporting Table

**Table S1.** Summary of thermoelectric performance of n-type Mg<sub>3</sub>Bi<sub>2</sub>-based thermoelectric materials.

| Materials                                                                                          | Synthesis        | 300 K<br><i>ZT</i> | Peak<br><i>ZT</i> | $S^2\sigma$<br>( $\mu\text{W cm}^{-1} \text{K}^{-2}$ ) | $\kappa$<br>( $\text{W m}^{-1} \text{K}^{-1}$ ) | Ref.             |
|----------------------------------------------------------------------------------------------------|------------------|--------------------|-------------------|--------------------------------------------------------|-------------------------------------------------|------------------|
| Mg <sub>3.4</sub> Bi <sub>1.29</sub> Sb <sub>0.7</sub> Te <sub>0.01</sub>                          | 1073 K<br>2 min  | 0.5                | 0.9               | 18.03                                                  | 1.07                                            | <b>This work</b> |
| Mg <sub>3.2</sub> Bi <sub>1.298</sub> Sb <sub>0.7</sub> Te <sub>0.002</sub>                        | 1053 K<br>2 min  | 0.75               | 0.92              | ~24                                                    | ~0.91                                           | 15               |
| Mg <sub>3.05</sub> (Bi <sub>0.7</sub> Sb <sub>0.3</sub> ) <sub>1.998</sub><br>Te <sub>0.004</sub>  | 1073 K<br>20 min | 0.6                | 1.1               | ~27                                                    | ~1.18                                           | 16               |
| Mg <sub>3.2</sub> Bi <sub>1.4</sub> Sb <sub>0.595</sub> Se <sub>0.005</sub>                        | 1053 K<br>2 min  | 0.82               | 1.2               | ~26                                                    | ~1.02                                           | 17               |
| Mg <sub>3.2</sub> Bi <sub>1.29</sub> Sb <sub>0.7</sub><br>Te <sub>0.01</sub>                       | 1053 K<br>2 min  | 0.5                | 1.07              | ~25                                                    | ~1.1                                            | 18               |
| Mg <sub>3.2</sub> Bi <sub>1.5</sub> Sb <sub>0.48</sub><br>Cu <sub>0.01</sub> Te <sub>0.02</sub>    | 973 K<br>10 min  | 0.87               | 1.12              | ~28                                                    | ~0.89                                           | 19               |
| Mg <sub>3.2</sub> Bi <sub>1.395</sub> Sb <sub>0.6</sub><br>Te <sub>0.005</sub>                     | 1073 K<br>20 min | 0.68               | 1.05              | ~28.5                                                  | ~1.15                                           | 20               |
| Mg <sub>3.17</sub> Mn <sub>0.03</sub> Bi <sub>1.29</sub><br>Sb <sub>0.7</sub> Te <sub>0.01</sub>   | 923 K<br>7 min   | 0.97               | 1.3               | ~28                                                    | ~0.9                                            | 21               |
| Mg <sub>3.2</sub> Nb <sub>0.01</sub> Bi <sub>1.29</sub><br>Sb <sub>0.7</sub> Te <sub>0.01</sub>    | 923 K<br>7 min   | 1.02               | 1.15              | ~25                                                    | ~0.92                                           | 22               |
| Mg <sub>3.2</sub> Bi <sub>1.498</sub> Sb <sub>0.7</sub><br>Te <sub>0.002</sub> Cu <sub>0.005</sub> | 973 K<br>10 min  | 0.92               | 1.2               | ~28                                                    | ~1.0                                            | 23               |



#### 4. Raw data

**Table S2.**  $\text{Mg}_{3+x}\text{Bi}_{1.29}\text{Sb}_{0.7}\text{Te}_{0.01}$  ( $x = 0.2, 0.3, 0.4, \text{ and } 0.5$ ).

| Temperature (K)           | $\sigma$ (S $\text{cm}^{-1}$ ) | $S$ ( $\mu\text{V K}^{-1}$ ) | $S^2\sigma$ ( $\mu\text{W cm}^{-1} \text{K}^{-2}$ ) | $\kappa$ ( $\text{W m}^{-1} \text{K}^{-1}$ ) | $\kappa_e$ ( $\text{W m}^{-1} \text{K}^{-1}$ ) | $\kappa_l$ ( $\text{W m}^{-1} \text{K}^{-1}$ ) | $ZT$      |
|---------------------------|--------------------------------|------------------------------|-----------------------------------------------------|----------------------------------------------|------------------------------------------------|------------------------------------------------|-----------|
| <b><math>x=0.2</math></b> |                                |                              |                                                     |                                              |                                                |                                                |           |
| 325.67983                 | 99.14822                       | 138.3393                     | 1.897475                                            | 0.80163                                      | 0.74479                                        | 0.05684                                        | 0.0770891 |
| 379.2596                  | 103.71378                      | 145.1916                     | 2.1863488                                           | 0.81359                                      | 0.74517                                        | 0.06842                                        | 0.1019179 |
| 429.3422                  | 114.27967                      | 146.6469                     | 2.4576201                                           | 0.83556                                      | 0.75043                                        | 0.08513                                        | 0.1262818 |
| 480.7089                  | 132.05882                      | 145.1302                     | 2.7815252                                           | 0.86626                                      | 0.75583                                        | 0.11043                                        | 0.1543536 |
| 531.2776                  | 154.94836                      | 139.2956                     | 3.006504                                            | 0.90852                                      | 0.76386                                        | 0.14466                                        | 0.1758121 |
| 580.2776                  | 172.88296                      | 137.0755                     | 3.2484177                                           | 1.00254                                      | 0.82544                                        | 0.1771                                         | 0.1880208 |
| 630.1987                  | 193.11607                      | 132.4416                     | 3.387406                                            | 1.07001                                      | 0.85342                                        | 0.21659                                        | 0.1995064 |
| 679.6201                  | 213.1613                       | 128.3093                     | 3.5093334                                           | 1.14248                                      | 0.88258                                        | 0.2599                                         | 0.2087576 |
| 728.3436                  | 233.86506                      | 124.9631                     | 3.6519845                                           | 1.22022                                      | 0.91256                                        | 0.30766                                        | 0.2179852 |
| 776.601                   | 253.30545                      | 117.8251                     | 3.5165773                                           | 1.28174                                      | 0.92102                                        | 0.36072                                        | 0.213068  |
| <b><math>x=0.3</math></b> |                                |                              |                                                     |                                              |                                                |                                                |           |
| 325.67983                 | 27.66273                       | -                            | 1.52531                                             | 0.68828                                      | 0.65909                                        | 0.02919                                        | 0.07217   |
| 379.2596                  | 43.92751                       | -                            | 2.61689                                             | 0.66137                                      | 0.62028                                        | 0.04109                                        | 0.15006   |
| 429.3422                  | 60.62462                       | -                            | 3.68645                                             | 0.6908                                       | 0.6351                                         | 0.0557                                         | 0.22912   |
| 480.7089                  | 76.60323                       | -                            | 4.86714                                             | 0.71766                                      | 0.64526                                        | 0.0724                                         | 0.32601   |
| 531.2776                  | 91.16984                       | -                            | 5.54181                                             | 0.7502                                       | 0.65946                                        | 0.09074                                        | 0.39246   |
| 580.2776                  | 102.80176                      | -                            | 5.74116                                             | 0.82029                                      | 0.71142                                        | 0.10887                                        | 0.40613   |

|              |           |               |          |         |         |         |         |
|--------------|-----------|---------------|----------|---------|---------|---------|---------|
| 630.1987     | 112.99993 | -<br>218.0237 | 5.37137  | 0.88889 | 0.76035 | 0.12854 | 0.38082 |
| 679.6201     | 122.2098  | -<br>195.9165 | 4.69081  | 0.9704  | 0.82032 | 0.15008 | 0.32852 |
| 728.3436     | 131.33644 | -167.707      | 3.69392  | 1.05613 | 0.88033 | 0.1758  | 0.25475 |
| 776.601      | 142.59619 | -<br>135.0261 | 2.59982  | 1.11515 | 0.90403 | 0.21112 | 0.18105 |
| <b>x=0.4</b> |           |               |          |         |         |         |         |
| 325.67983    | 341.49705 | -<br>139.1917 | 6.61628  | 1.00636 | 0.76046 | 0.2459  | 0.21412 |
| 379.2596     | 423.28275 | -170.495      | 12.30421 | 0.99123 | 0.69333 | 0.2979  | 0.47078 |
| 429.3422     | 460.44268 | -<br>186.1372 | 15.95299 | 0.9811  | 0.6567  | 0.329   | 0.69812 |
| 480.7089     | 461.23398 | -<br>198.1659 | 18.11253 | 0.99463 | 0.63503 | 0.3596  | 0.87539 |
| 531.2776     | 437.8347  | -<br>204.2575 | 18.26697 | 1.00034 | 0.62544 | 0.3749  | 0.97015 |
| 580.2776     | 403.38407 | -<br>210.3372 | 17.84642 | 1.0628  | 0.6872  | 0.3756  | 0.9744  |
| 630.1987     | 366.35713 | -<br>208.4499 | 15.91871 | 1.15148 | 0.78008 | 0.3714  | 0.87122 |
| 679.6201     | 333.42147 | -<br>204.7151 | 13.97312 | 1.27941 | 0.91341 | 0.366   | 0.74225 |
| 728.3436     | 307.0115  | -<br>197.2813 | 11.94886 | 1.43272 | 1.06882 | 0.3639  | 0.60744 |
| 776.601      | 287.62659 | -<br>181.6806 | 9.49393  | 1.62706 | 1.25656 | 0.3705  | 0.45315 |
| <b>x=0.5</b> |           |               |          |         |         |         |         |
| 325.67983    | 162.93712 | -<br>149.7409 | 3.65343  | 0.92316 | 0.83155 | 0.09161 | 0.12889 |
| 379.2596     | 216.78022 | -<br>171.4106 | 6.36935  | 0.91461 | 0.77708 | 0.13753 | 0.26412 |
| 429.3422     | 258.10228 | -             | 8.74745  | 0.90463 | 0.72211 | 0.18252 | 0.41516 |

|          |           |               |          |         |         |         |         |
|----------|-----------|---------------|----------|---------|---------|---------|---------|
|          |           | 184.0962      |          |         |         |         |         |
| 480.7089 | 283.39233 | -<br>198.0874 | 11.11992 | 0.91562 | 0.69454 | 0.22108 | 0.58381 |
| 531.2776 | 291.08582 | -<br>203.4937 | 12.05377 | 0.9498  | 0.70012 | 0.24968 | 0.67424 |
| 580.2776 | 286.55348 | -<br>206.6899 | 12.24177 | 1.01151 | 0.74383 | 0.26768 | 0.70228 |
| 630.1987 | 275.48004 | -<br>205.7093 | 11.6573  | 1.09683 | 0.81711 | 0.27972 | 0.66979 |
| 679.6201 | 264.42015 | -<br>198.5017 | 10.41892 | 1.21633 | 0.92481 | 0.29152 | 0.58215 |
| 728.3436 | 253.77877 | -<br>187.5542 | 8.92707  | 1.36203 | 1.05876 | 0.30327 | 0.47737 |
| 776.601  | 247.88167 | -<br>172.2636 | 7.35583  | 1.54535 | 1.22369 | 0.32166 | 0.36966 |

**Table S3.** Mg<sub>3.4</sub>Bi<sub>1.29</sub>Sb<sub>0.7</sub>Te<sub>0.01</sub> samples sintered at different temperatures of 923, 1023, and 1073 K

| Temperature (K)           | $\sigma$ (S cm <sup>-1</sup> ) | $S$ ( $\mu$ V K <sup>-1</sup> ) | $S^2\sigma$ ( $\mu$ W cm <sup>-1</sup> K <sup>-2</sup> ) | $\kappa$ (W m <sup>-1</sup> K <sup>-1</sup> ) | $\kappa_e$ (W m <sup>-1</sup> K <sup>-1</sup> ) | $\kappa_l$ (W m <sup>-1</sup> K <sup>-1</sup> ) | $ZT$    |
|---------------------------|--------------------------------|---------------------------------|----------------------------------------------------------|-----------------------------------------------|-------------------------------------------------|-------------------------------------------------|---------|
| <b>sintered at 973 K</b>  |                                |                                 |                                                          |                                               |                                                 |                                                 |         |
| 325.67983                 | 341.49705                      | -139.1917                       | 6.61628                                                  | 1.00636                                       | 0.76046                                         | 0.2459                                          | 0.21412 |
| 379.2596                  | 423.28275                      | -170.495                        | 12.30421                                                 | 0.99123                                       | 0.69333                                         | 0.2979                                          | 0.47078 |
| 429.3422                  | 460.44268                      | -186.1372                       | 15.95299                                                 | 0.9812                                        | 0.6567                                          | 0.3291                                          | 0.69812 |
| 480.7089                  | 461.23398                      | -198.1659                       | 18.11253                                                 | 0.99463                                       | 0.63503                                         | 0.3596                                          | 0.87539 |
| 531.2776                  | 437.8347                       | -204.2575                       | 18.26697                                                 | 1.00034                                       | 0.62544                                         | 0.3749                                          | 0.97015 |
| 580.2776                  | 403.38407                      | -210.3372                       | 17.84642                                                 | 1.0628                                        | 0.6872                                          | 0.3756                                          | 0.9744  |
| 630.1987                  | 366.35713                      | -208.4499                       | 15.91871                                                 | 1.15148                                       | 0.78008                                         | 0.3714                                          | 0.87122 |
| 679.6201                  | 333.42147                      | -204.7151                       | 13.97312                                                 | 1.27941                                       | 0.91341                                         | 0.366                                           | 0.74225 |
| 728.3436                  | 307.0115                       | -197.2813                       | 11.94886                                                 | 1.43272                                       | 1.06882                                         | 0.3639                                          | 0.60744 |
| 776.601                   | 287.62659                      | -181.6806                       | 9.49393                                                  | 1.62706                                       | 1.25656                                         | 0.3705                                          | 0.45315 |
| <b>sintered at 1023 K</b> |                                |                                 |                                                          |                                               |                                                 |                                                 |         |
| 325.67983                 | 712.17615                      | -150.8454                       | 16.20511                                                 | 1.11304                                       | 0.71244                                         | 0.4006                                          | 0.47314 |
| 379.2596                  | 608.48607                      | -171.5256                       | 17.90229                                                 | 1.0682                                        | 0.6836                                          | 0.3846                                          | 0.63433 |
| 429.3422                  | 524.55357                      | -185.5032                       | 18.05064                                                 | 1.03473                                       | 0.66533                                         | 0.3694                                          | 0.74885 |
| 480.7089                  | 449.89781                      | -197.7618                       | 17.59539                                                 | 1.01772                                       | 0.66682                                         | 0.3509                                          | 0.83048 |
| 531.2776                  | 391.25667                      | -209.2352                       | 17.12898                                                 | 1.01901                                       | 0.68551                                         | 0.3335                                          | 0.88998 |
| 580.2776                  | 345.04092                      | -211.8811                       | 15.49013                                                 | 1.04042                                       | 0.71952                                         | 0.3209                                          | 0.86161 |
| 630.1987                  | 307.52766                      | -211.9032                       | 13.8089                                                  | 1.08719                                       | 0.77639                                         | 0.3108                                          | 0.79792 |
| 679.6201                  | 279.73804                      | -208.3014                       | 12.13769                                                 | 1.15952                                       | 0.85352                                         | 0.306                                           | 0.70973 |
| 728.3436                  | 259.48819                      | -196.8167                       | 10.05175                                                 | 1.25933                                       | 0.95163                                         | 0.3077                                          | 0.58011 |
| 776.601                   | 246.31798                      | -180.2378                       | 8.00181                                                  | 1.37667                                       | 1.05887                                         | 0.3178                                          | 0.45144 |

| <b>sintered at 1073 K</b> |           |           |          |         |         |        |         |
|---------------------------|-----------|-----------|----------|---------|---------|--------|---------|
| 325.67983                 | 718.45055 | -153.128  | 16.84637 | 1.2222  | 0.8427  | 0.3795 | 0.45104 |
| 379.2596                  | 618.23649 | -173.6059 | 18.63303 | 1.16109 | 0.79369 | 0.3674 | 0.60535 |
| 429.3422                  | 525.23702 | -192.7955 | 19.52312 | 1.11458 | 0.76868 | 0.3459 | 0.75198 |
| 480.7089                  | 445.20821 | -205.6814 | 18.83447 | 1.08279 | 0.75789 | 0.3249 | 0.83762 |
| 531.2776                  | 380.48723 | -217.7043 | 18.03325 | 1.07423 | 0.77063 | 0.3036 | 0.89343 |
| 580.2776                  | 329.67272 | -224.712  | 16.64697 | 1.09244 | 0.80644 | 0.286  | 0.88712 |
| 630.1987                  | 291.10815 | -224.4565 | 14.66623 | 1.13599 | 0.86139 | 0.2746 | 0.81687 |
| 679.6201                  | 263.59879 | -217.4587 | 12.46514 | 1.21184 | 0.94204 | 0.2698 | 0.7017  |
| 728.3436                  | 244.65485 | -206.8345 | 10.46646 | 1.31688 | 1.04598 | 0.2709 | 0.58193 |
| 776.601                   | 233.92558 | -188.4561 | 8.30803  | 1.45985 | 1.17805 | 0.2818 | 0.44489 |

## References

1. G. Kresse and J. Hafner, *Phys. Rev. B*, 1994, **49**, 14251-14269.
2. G. Kresse and J. Hafner, *Phys. Rev. B*, 1993, **47**, 558-561.
3. G. Kresse and J. Furthmüller, *Comp. Mater. Sci.*, 1996, **6**, 15-50.
4. G. Kresse and J. Hafner, *J. Phys. Condens. Mat.*, 1994, **6**, 8245-8257.
5. G. Kresse and J. Furthmüller, *Phys. Rev. B*, 1996, **54**, 11169-11186.
6. G. Kresse and D. Joubert, *Phys. Rev. B*, 1999, **59**, 1758-1775.
7. J. P. Perdew, K. Burke and M. Ernzerhof, *Phys. Rev. Lett.*, 1996, **77**, 3865-3868.
8. A. R. Oganov and C. W. Glass, *J. Chem. Phys.*, 2006, **124**, 244704.
9. W. Setyawan and S. Curtarolo, *Comp. Mater. Sci.*, 2010, **49**, 299-312.
10. F. Tran and P. Blaha, *Phys. Rev. Lett.*, 2009, **102**, 226401.
11. X. L. Shi, K. Zheng, M. Hong, W. D. Liu, R. Moshwan, Y. Wang, X.-L. Qu, Z. G. Chen and J. Zou, *Chem. Sci.*, 2018, **9**, 7376-7389.
12. X. Shi, A. Wu, T. Feng, K. Zheng, W. Liu, Q. Sun, M. Hong, S. T. Pantelides, Z. G. Chen and J. Zou, *Adv. Energy Mater.*, 2019, **9**, 1803242.
13. X. Shi, A. Wu, W. Liu, R. Moshwan, Y. Wang, Z.-G. Chen and J. Zou, *ACS Nano*, 2018, **12**, 11417-11425.
14. M. Jin, X.-L. Shi, T. Feng, W. Liu, H. Feng, S. T. Pantelides, J. Jiang, Y. Chen, Y. Du, J. Zou and Z.-G. Chen, *ACS Appl. Mater. Interfaces*, 2019, **11**, 8051-8059.
15. J. Mao, H. Zhu, Z. Ding, Z. Liu, G. A. Gamage, G. Chen and Z. Ren, *Science*, 2019, **365**, 495-498.
16. K. Imasato, S. D. Kang and G. J. Snyder, *Energy Environ. Sci.*, 2019, **12**, 965-971.

17. X. Mo, J. Liao, G. Yuan, S. Zhu, X. Lei, L. Huang, Q. Zhang, C. Wang and Z. Ren, *J. Magnes. Alloy.*, 2022, **10**, 1024-1032.
18. Z. Liang, C. Xu, H. Shang, Q. Zhu, F. Ding, J. Mao and Z. Ren, *Mater. Today Phys.*, 2021, **19**, 100413.
19. Z. Liu, W. Gao, H. Oshima, K. Nagase, C.-H. Lee and T. Mori, *Nat. Commun.*, 2022, **13**, 1120.
20. N. Qu, Y. Zhu, J. Zhu, K. Yu, F. Guo, Z. Liu, Q. Zhang, W. Cai and J. Sui, *J. Magnes. Alloy.*, 2024, **12**, 4538-4546.
21. K. Yang, X. Li, C. Sun, W. Song, W. Zhao and Q. Zhang, *Adv. Funct. Mater.*, 2024, **34**, 2315886.
22. X. Li, C. Sun, K. Yang, D. Liang, X. Ye, W. Song, W. Xu, W. Zhao and Q. Zhang, *Small*, 2024, **20**, 2311478.
23. H. Cho, S. Y. Back, N. Sato, Z. Liu, W. Gao, L. Wang, H. D. Nguyen, N. Kawamoto and T. Mori, *Adv. Funct. Mater.*, 2024, **34**, 2407017.
